# Supplementary material
Source: Elsevier journal article supplement (https://git.physik.uzh.ch/gitbucket/mchrzasz/Lecture_repo/raw/4ba76f56516b6d41c1f883488c4a79c52c349efd/Lectures_others/MC/W_Placzek_2010/mmc13.pdf)
Supplement: mmc13 [file mmc13.pdf]

# Modelowanie (symulacje) Monte Carlo

- **Wstęp.**
- **Przykład z fizyki cząstek.**
- **System masowej obsługi.**
  - ▷ **System masowej obsługi z jednym kanałem.**
  - ▷ **Typowy przykład systemu masowej obsługi.**
- **Przykład zagadnienia z teorii gier.**
- **Perpektywy.**

- Zagadnienie ilościowego opisu różnorodnych zjawisk i procesów fizycznych, chemicznych, biologicznych, technicznych, ekonomicznych, społecznych itd. sprowadza się często do rozwiązania odpowiednio sformułowanych zadań matematycznych: obliczenia pewnych całek, rozwiązania równań różniczkowych, równań całkowych, układów równań itp.
- Rozwiązanie tego typu zadań matematycznych metodami Monte Carlo wymaga sformułowania dla nich odpowiednich modeli probabilistycznych, skonstruowania odpowiednich zmiennych losowych lub procesów stochastycznych, których obserwacja pozwala na oszacowanie interesujących nas rozwiązań zadań numerycznych.
- Czasem badany proces ma naturę probabilistyczną – wówczas sam może być wzorcem do zbudowania odpowiedniego modelu Monte Carlo. W takim przypadku rachunki Monte Carlo będą bezpośrednią symulacją (modelowaniem) danego procesu.
- Niektóre zadania mogą nie być natury probabilistycznej, a jednak może dać się dla nich skonstruować model Monte Carlo dający poszukiwane rozwiązanie. Tego typu zagadnienia wymagają od nas większej inwencji i wyobraźni!
- Modelowanie (symulacje) Monte Carlo stosuje się szczególnie do rozwiązywania problemów trudnych, złożonych, gdzie metody analityczne, czy też inne metody numeryczne zawodzą.

## ► Powody stosowania metod modelowania (symulacji) procesów, zjawisk itp.

- Chcemy sprawdzić, czy dany model teoretyczny opisuje badaną rzeczywistość, np. fizyka.
  - Przeprowadzenie rzeczywistych eksperymentów może być zbyt kosztowne, np. ekonomia (może także wywołać niezadowolenie społeczne).
  - Przeprowadzenie rzeczywistych eksperymentów jest niemożliwe dla nas, np. kosmologia (nie możemy kreować wszechświatów i badać ich ewolucji).
  - Przeprowadzenie rzeczywistych eksperymentów może być niehumanitarne, np. biologia, medycyna (badanie rozwoju mutacji, chorób zakaźnych itp.).
  - Przeprowadzenie rzeczywistych eksperymentów może być niebezpieczne, np. wojsko (badanie efektów działania nowych rodzajów broni, różnych strategii wojennych itp.).
  - Prowadzenie rzeczywistych obserwacji może być zbyt czasochłonne, np. klimatologia, geologia, socjologia.
- Modelowanie MC polega na konstruowaniu (generowaniu) odpowiedniej próby losowej danej populacji i obliczaniu pewnych jej parametrów: wartość oczekiwana, wariancja, wyższe momenty, funkcje korelacji, rozkłady różnych wielkości itd.

- W eksperymentach fizyki cząstek polegających na zderzaniu cząstek naładowanych o wysokich energiach produkowanych jest bardzo wiele cząstek: dziesiątki, setki, a nawet tysiące (np. LHC).
- Do teoretycznego opisu takich procesów używa się wielowymiarowych całek – dla  $n$  cząstek w stanie końcowym liczba wymiarów wynosi  $3n - 4$ .
- Obszar całkowania jest bardzo skomplikowany ze względu na złożone kryteria detekcji cząstek w urządzeniach pomiarowych (detektorach).
- ▶ Jedynym sposobem weryfikacji przewidywań teoretycznych na podstawie wyników eksperymentalnych jest wykonanie modelowania Monte Carlo badanych procesów w oparciu o konkretne modele teoretyczne, a następnie dokonanie odpowiednich porównań.
  - ▷ Srowadza się to do generowania wielowymiarowych rozkładów prawdopodobieństwa danych przez odpowiednio znormalizowane funkcje podcałkowe oraz wyliczania odpowiednich całek.
  - ▷ Generowane punkty losowe odwzorowuje się na wielkości fizyczne w postaci rodzajów produkowanych cząstek oraz ich energii i pędów. Na tego typu **przypadki** można nakładać dowolne kryteria pomiarowe.
- ▶ Przypadki wygenerowane przez teoretyczne generatory Monte Carlo są podawane na wejście generatorów Monte Carlo modelujących aparaturę detekcyjną – dopiero ich wyniki są porównywane z wynikami eksperymentalnymi.

## Podstawowa strategia analizy danych eksperymentalnych

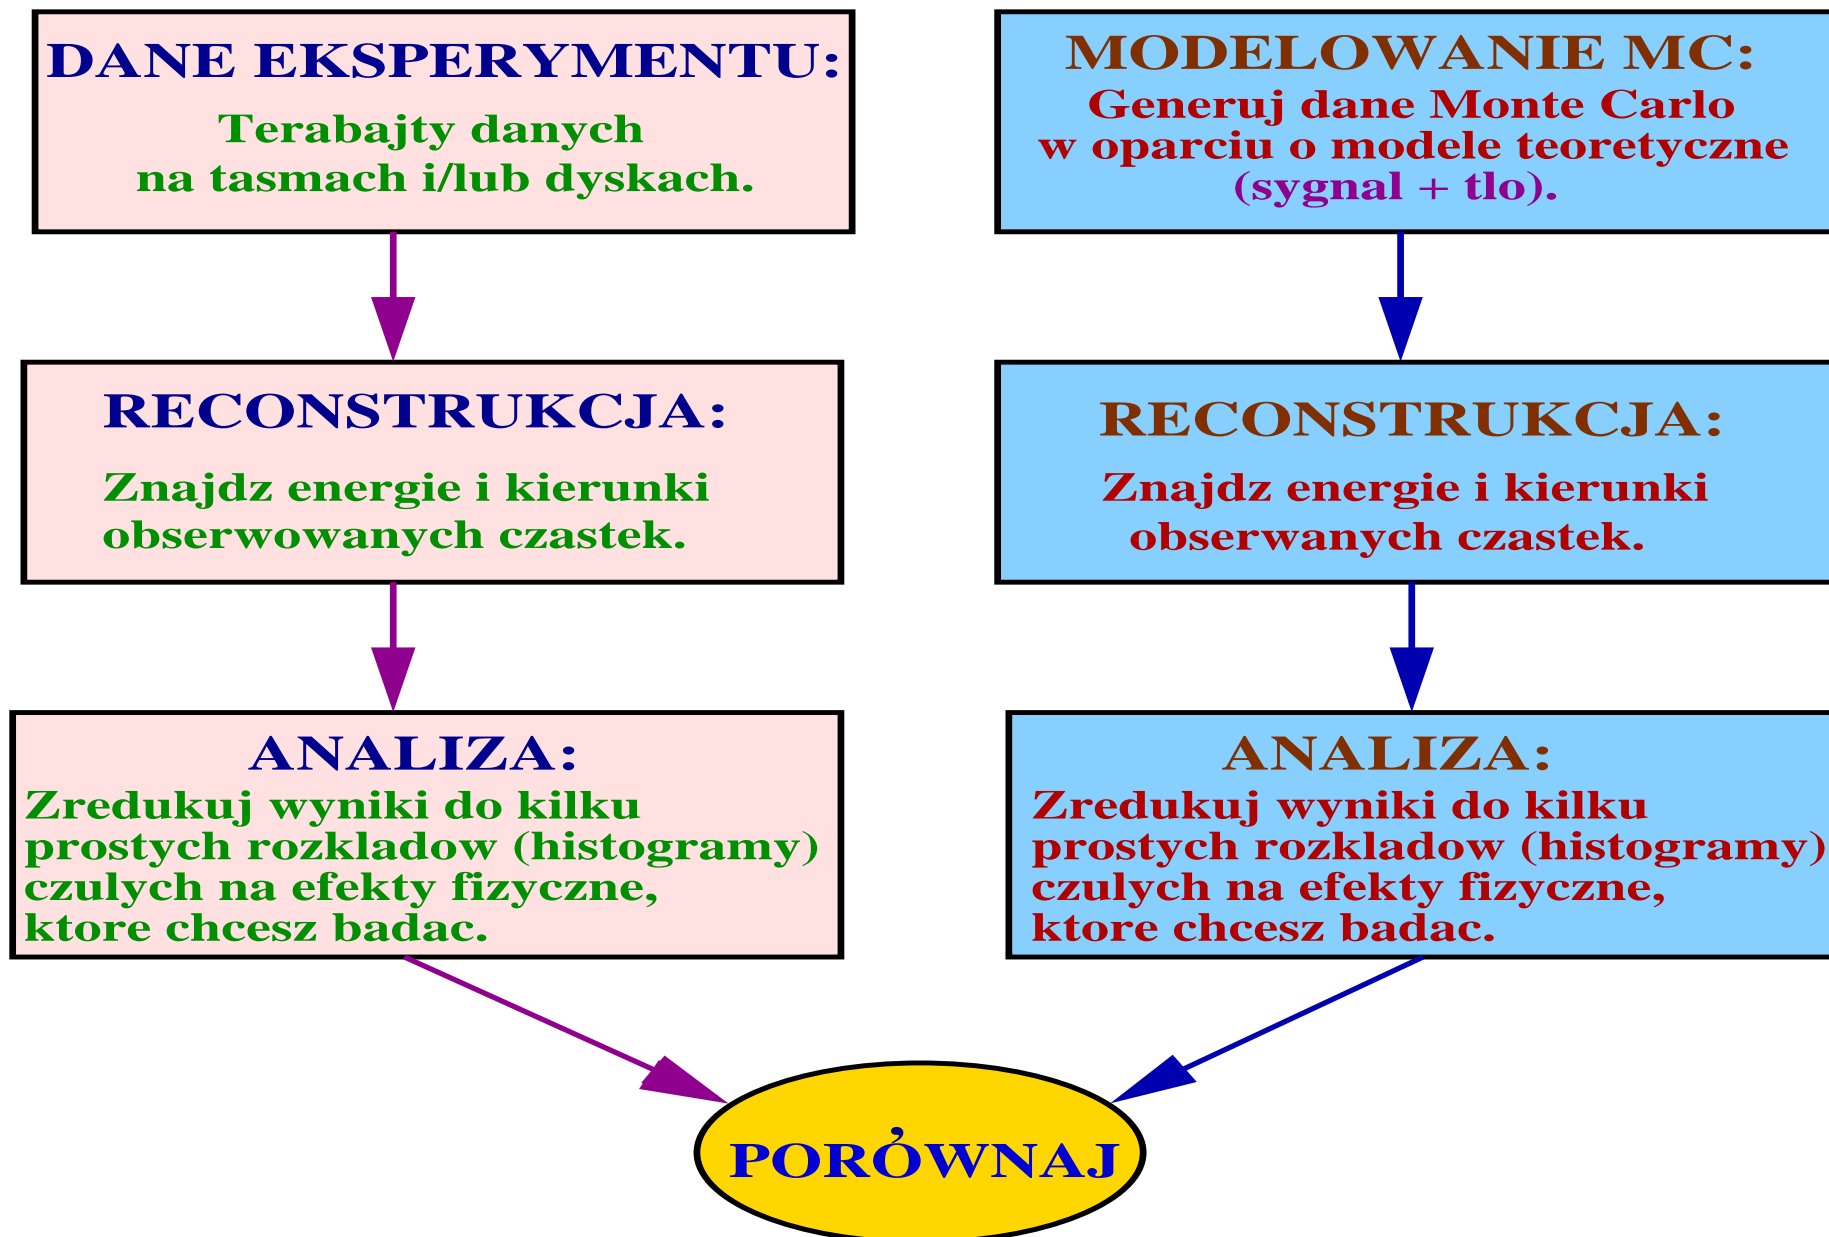

- ▶ Różnego rodzaju **modele masowej obsługi** stosuje się do opisu procesów w przemyśle, handlu, transporcie, telekomunikacji, informatyce (systemy operacyjne, sieci komputerowe, ...) itd.

## System masowej obsługi charakteryzuje się:

1. **Strumieniem zgłoszeń**, który określony jest przez podanie łącznego rozkładu prawdopodobieństwa długości przedziałów czasu pomiędzy kolejnymi zgłoszeniami.
  2. Istnieniem pewnej liczby **urządzeń obsługujących**, zwanych też **kanałami**. Każdy kanał charakteryzuje się czasem, w jakim dokonuje obsługi. Czas ten jest zmienną losową, której rozkład powinien być z góry określony. Zgłoszenia pojawiające się w chwilach, gdy kanały są zajęte, tworzą **kolejkę**.
  3. **Regulaminem czekania na obsługę** i **regulaminem obsługi** – również opisywane za pomocą pewnych rozkładów prawdopodobieństwa.
- ▷ Jeżeli zgłoszenia obsłużone przez jeden system kierowane są na wejście innego systemu, to zbiór tych systemów obsługi tworzy **sieć**.
  - ▶ Ponieważ zagadnienia masowej obsługi formułowane są w języku teorii prawdopodobieństwa, to naturalnymi sposobami ich rozwiązywania stają się metody symulacji Monte Carlo.
    - ▷ Przy użyciu aparatu analitycznego teorii masowej obsługi można rozwiązać niewiele i w dodatku jedynie stosunkowo prostych zadań.

- ▶ Najprostszym dobrze zbadanym przykładem systemu masowej obsługi jest system z **jednym kanałem**, w którym:
  - czasy  $\tau_i$  między kolejnymi zgłoszeniami są niezależnymi zmiennymi losowymi o rozkładzie wykładniczym z parametrem  $\lambda$  ( $p_\lambda(X) = \lambda e^{-\lambda X}$ ,  $x \geq 0$ ;  $E(X) = \sigma(X) = 1/\lambda$ );
  - czasy obsługi są również zmiennymi losowymi o rozkładzie wykładniczym z parametrem  $\mu$ ;
  - zgłoszenia tworzą kolejkę uporządkowaną według czasów ich nadejścia (FIFO).

System jest scharakteryzowany przy pomocy prawdopodobieństw  $p_n(t)$  zdarzeń polegających na tym, że w chwili  $t$  znajduje się w nim (w kolejce i w obsłudze)  $n$  zgłoszeń.

- ▷ Jeżeli  $\lambda/\mu < 1$ , to  $p_n(t)$  mają pewną granicę przy  $t \rightarrow \infty$ , która nie zależy od  $t$  – **stan stacjonarny** (ten przypadek może być całkowicie rozwiązany metodami analitycznymi).
- ▶ Symulowanie (modelowanie) MC polega na generowaniu zmiennych losowych o rozkładzie wykładniczym i obliczaniu liczby zgłoszeń w systemie w ustalonej chwili  $t$ .
  - ▷ Szacowanie prawdopodobieństw  $p_n(t)$  można uzyskać przez powtórzenie symulacji  $N$  razy i zbudowanie histogramu rozkładu liczby zgłoszeń w systemie w chwili czasu  $t$ .
  - ▷ Z reguły oblicza się nie wartości  $p_n(t)$ , lecz inne charakterystyki, np. średni czas życia w kolejce w okresie  $[0, t]$  itp.

Niech  $t_1, t_2, \dots$  będą chwilami, w których nadchodzą zgłoszenia.

- Zakładamy, że zmienne  $\tau_n = t_n - t_{n-1}$  ( $n = 1, 2, \dots, t_0 = 0$ ) są niezależne i mają jednakowy rozkład o dystrybuancie  $A(\tau_n) = A(\tau)$ .
- Jeżeli w chwili zgłoszenia wolnych jest  $l$  kanałów obsługi, to zgłoszenie może wybrać sobie kanał, np. z najkrótszym średnim czasem obsługi.
- Zakładamy, że czasy  $z$  obsługi zgłoszeń przez poszczególne kanały są niezależnymi zmiennymi losowymi o jednakowym rozkładzie z dystrybuantą  $B(z)$  oraz że, gdy  $l > 0$ , to zgłoszenie natychmiast zajmuje jeden z kanałów obsługi. Jeżeli  $l = 0$ , to zgłoszenie zajmuje miejsce w kolejce.
- Kolejki mogą być różnego typu: priorytetowe, FIFO, LIFO itd. System obsługi może być wyłuszczający, tzn. pewne zgłoszenia mogą przerywać obsługę innych zgłoszeń.
  - ▷ My rozważymy przypadek kolejki FIFO bez wyłuszczeń.
- Zgłoszenia obsłużone opuszczają system tworząc strumień wyjściowy.



## Symulacje Monte Carlo:

- Generujemy kolejno chwile pojawiania się zgłoszeń:

$$t_1 = \tau_1, t_2 = t_1 + \tau_2, \dots, t_n = t_{n-1} + \tau_n$$

oraz czasy trwania obsługi:

$$z_1, z_2, \dots, z_n$$

według rozkładów o dystrybuantach odpowiednio  $A(\tau)$  i  $B(z)$ .

- Jeżeli  $u_n$  oznacza czas czekania  $n$ -tego zgłoszenia na rozpoczęcie obsługi, to  $t_n + u_n$  jest chwilą rozpoczęcia obsługi tego zgłoszenia, a  $t_n + u_n + z_n$  jest chwilą, gdy opuszcza ono system.
- Niech  $t_n + \bar{w}_{n,i}$ , ( $i = 1, \dots, k$ ) oznacza chwilę, w której  $i$ -ty kanał kończy obsługę tych spośród  $(n - 1)$  pierwszych zgłoszeń, które były w nim obsługiwane, tzn.  $\bar{w}_{n,i}$  jest długością odcinka czasu pomiędzy chwilą  $t_n$  a chwilą, w której  $i$ -ty kanał kończy obsługę tych zgłoszeń, które nastąpiły do chwili  $t_n$ .

▷ Wówczas:

$$u_n = \min \{ \bar{w}_{n,1}, \dots, \bar{w}_{n,k} \}.$$

## Symulacje Monte Carlo – c.d.

- Wektor  $\bar{\mathbf{w}}_n = (\bar{w}_{n,1}, \dots, \bar{w}_{n,k})$  opisuje sytuację w każdym kanale w procesie obsługi. W chwili początkowej wektor  $\bar{\mathbf{w}}_1$  jest znany (zwykle jest to wektor zerowy).

- Zgłoszenie o numerze  $n$  jest obsługiwane przez jeden z kanałów o numerze  $i_0$  takim, dla którego:

$$\bar{w}_{n,i_0} = \min \{ \bar{w}_{n,1}, \dots, \bar{w}_{n,k} \}.$$

Fakt ten uwzględniamy zwiększając  $i_0$ -tą składową powyższego wektora o czas obsługi  $z_n$ :

$$\bar{w}_{n,i_0} := \bar{w}_{n,i_0} + z_n.$$

- Następną zmianą następuje po czasie  $\tau_{n+1}$ , kiedy to pojawia się nowe zgłoszenie.

Wektor  $\bar{\mathbf{w}}_{n+1}$  obliczamy odejmując od każdej składowej wektora  $\bar{\mathbf{w}}_n$  wartość  $\tau_{n+1}$ , przy czym składowe ujemne zastępujemy zerami, tzn.

$$\bar{w}_{n+1,i} = \min \{ 0, \bar{w}_{n,i} - \tau_{n+1} \}, \quad i = 1, \dots, k.$$

- Najmniejszą wartość składowej wektora  $\bar{\mathbf{w}}_{n+1}$  przyjmujemy za  $u_{n+1}$  (tzn. czas czekania  $(n+1)$ -ego zgłoszenia na rozpoczęcie obsługi). Jeżeli najmniejsza wartość pojawia się dla kilku składowych wektora  $\bar{\mathbf{w}}_{n+1}$ , to możemy np. wybrać składową (kanał) o najmniejszym numerze albo z jednakowym prawdopodobieństwem wylosować którąś z takich składowych.

## Symulacje Monte Carlo – c.d.

- ▶ Wykonując taką symulację pracy systemu możemy oszacować różne charakterystyki:

- ▷ Na przykład, jeżeli nastąpiło  $N$  zgłoszeń, to:

$$\hat{U} = \frac{1}{N} \sum_{n=1}^N u_n$$

może być oszacowaniem **średniego czasu czekania na rozpoczęcie obsługi.**

- ▷ W analogiczny sposób konstruuje się estymatory innych wielkości:

- **średnia liczba zgłoszeń czekających na obsługę,**
- **średnia liczba wolnych kanałów,**
- **średni czas przebywania zgłoszenia w systemie itd.**

- ▶ Zwykle za pomocą metod Monte Carlo symuluje się bardziej skomplikowane systemy i sieci niż w przedstawionym przykładzie. Rozkłady wyjściowe nierzadko konstruuje się eksperymentalnie i wstępnie opracowuje.

- ▷ Na przykład, jeżeli symuluje się ruch pasażerski na pewnej linii autobusowej, to charakterystyki strumienia pasażerów powinny być określone eksperymentalnie na każdym przystanku tej linii.

► W modelach masowej obsługi poza rozkładem wykładniczym z parametrem stałym  $\lambda$  lub zależnym od czasu  $\lambda(t)$ , rozważa się często również następujące rozkłady:

- **Rozkład Erlanga** – o gęstości prawdopodobieństwa:

$$\rho_{k,\lambda}(X) = \frac{\lambda^k X^{k-1} e^{-\lambda X}}{(k-1)!}.$$

▷ Taki rozkład ma suma  $k$  niezależnych zmiennych losowych o rozkładzie wykładniczym z gęstością  $\rho_\lambda(X) = \lambda e^{-\lambda X}$ .

- **Rozkład hiperwykładniczy** – o gęstości prawdopodobieństwa:

$$\rho(X) = \sum_{i=1}^k p_i \lambda_i e^{-\lambda_i X}, \quad \sum_{i=1}^k p_i = 1, \quad p_i > 0, \quad \lambda_i > 0, \quad X \geq 0.$$

▷ Wielkości  $\lambda_i$  i  $p_i$  mogą w ogólności zależeć od czasu.

→ Rozkład ten można generować metodą superpozycji rozkładów wykładniczych.

► Do programowania zadań symulacyjnych opracowano nawet specjalne języki algorytmiczne, np. SIMULA, SIMPAC, SIMSCRIPT.

## Symulacja bitwy czołgów

- ▶ Praca wykonana dla sił zbrojnych Szwecji (S. E. Andersson, 1966).
  - Zakłada się, że w bitwie bierze udział co najwyżej 15 czołgów z każdej strony.
  - Zakłada się, iż na skutek dużej szybkostrzelności i wysokiego prawdopodobieństwa trafienia z odległości mniejszych niż 1.5 km bitwa odbywa się tak szybko, że można pominąć przemieszczanie się czołgów w czasie jej trwania, tzn. czołgi prowadzą ogień tylko z ustalonych pozycji, a ich ruch jest możliwy tylko w początkowym okresie.
  - Cały przedział czasowy dzieli się na jednakowe podprzedziały i po każdym okresie czasu analizuje się „pole bitwy” uwzględniając wszystkie zmiany spowodowane działalnością walczących czołgów.
  - Zakłada się, że każdy czołg może znajdować się w jednym z następujących stanów:
    1. Nieuszkodzony.
    2. Może tylko strzelać.
    3. Może tylko się poruszać.
      - P. Stan przejściowy.
    4. Zniszczony.
- ▷ W stanie przejściowym znajduje się czołg, który został porażony, ale nie zniszczony – po pewnym czasie może przejść do jednego z trzech poprzednich stanów.

## Symulacja bitwy czołgów – c.d.

- Czołg, poza stanem, charakteryzuje się również innymi cechami: prędkość, rodzaj użytej broni w danej chwili, szybkostrzelność, czas wyjścia ze stanu przejściowego itd.
  - ▷ Niektóre z nich mogą być stałe, inne mogą się zmieniać w czasie bitwy.
- Działanie strony  $A$  przeciwko stronie  $B$  opisuje się przy pomocy **macierzy działań**:

$$\mathbf{M}_{AB} = (m_{AB}(i, j)) .$$

▷ Niech  $A_i$  oznacza  $i$ -ty czołg strony  $A$ , a  $B_j$  oznacza  $j$ -ty czołg strony  $B$  – wówczas  $m_{AB}(i, j)$  przyjmuje następujące wartości:

| $m_{AB}(i, j) =$                                            | 0   | 1   | 2   | 3   | 4   |
|-------------------------------------------------------------|-----|-----|-----|-----|-----|
| Czy czołg $A_i$ zauważył czołg $B_j$                        | nie | tak | tak | tak | tak |
| Czy czołg $A_i$ wziął na cel czołg $B_j$                    | nie | nie | tak | tak | tak |
| Czy czołg $A_i$ chociaż raz wystrzelił do czołgu $B_j$      | nie | nie | nie | tak | tak |
| Czy w danej chwili pocisk czołgu $A_i$ leci do czołgu $B_j$ | nie | nie | nie | nie | tak |

▷ Np.  $m_{AB}(i, j) = 3$  oznacza, że  $A_i$  przygotowuje się do następnego strzału do  $B_j$ .

## Symulacja bitwy czołgów – c.d.

- Początkowa faza jest bardzo ważna dla wyniku bitwy, zwłaszcza bardzo ważne jest jak szybko obie strony zauważą się wzajemnie – zależy to od wielu czynników. Np. jeżeli czołg jest zamaskowany w pewnej stacjonarnej pozycji, to trudno go zauważyć dopóki nie wystrzeli.
- W prezentowanym modelu wprowadzono prawdopodobieństwo  $p_{ij}$  tego, że czołg  $A_i$  zauważył czołg  $B_j$  w okresie czasu  $(t - \Delta t, t)$  pod warunkiem, iż nie zauważył go w okresie czasu  $(0, t - \Delta t)$ :

$$p_{ij}(t) = \frac{g_{i,j} [h_i(t) + S_{j,k}(t) K_j]}{d_{i,j}} \Delta t,$$

gdzie

$$g_{i,j}(t) = \begin{cases} 0, & t < \tau_{i,j}, \\ 1, & t \geq \tau_{i,j}; \end{cases}$$

$\tau_{i,j}$  jest chwilą, w której nastąpiła bezpośrednia widoczność między  $A_i$  i  $B_j$ .

$h_i(t)$  jest funkcją intensywności obserwacji  $A_i$  – jest ona stała do i po chwili czasu  $t = t_2$ , a dla  $t = t_2$  ma dodatni skok;  $t_2$  jest chwilą, w której wiadomo, że pojawiły się czołgi nieprzyjacielskie – jest ona sumą chwili  $t_1$  zauważenia przez stronę  $A$  przeciwnika po raz pierwszy i pewnego losowego odstępu czasu podania tej wiadomości.

## Symulacja bitwy czołgów – c.d.

- Funkcja  $S_{j,k}(t)$  charakteryzuje efekt stwierdzenia, że w chwili  $t$  czołg  $B_j$  oddał  $k$ -ty strzał. Wielkość  $K_j$  uwzględnia efekt maskowania się, natomiast  $d_{i,j}$  jest odległością między  $A_i$  i  $B_j$ .
- Macierz  $(\tau_{i,j})$  wyznacza się w początkowej fazie ruchu czołgów – uwzględnia się przy tym warunki miejsca, jak istnienie mgły itp.
- Reguły wyboru celu były w rozważanym modelu zdeterminowane.
- Posługiwano się dwoma rodzajami taktyki:
  1. **Strzelanie natychmiast po zauważeniu celu** – stosowana w przypadku niespodziewanego kontaktu.
  2. **Strzelanie na rozkaz dowódcy** – stosowana w przypadku zawczasu przygotowanego ataku.
- Jeżeli cel był zniszczony lub znajdował się w stanie przejściowym, to wybierano nowy cel. Wprowadzano przy tym różne priorytety uwzględniając wzajemne położenie przeciwników.
- Zakładano, że prawdopodobieństwo porażenia jest funkcją odległości między czołgami, a ponadto zależy od rodzaju broni, dokładności określenia odległości i wielkości celu.



## Symulacja bitwy czołgów – c.d.

- Jeżeli trafiono w cel, to przechodził on do innego stanu.
- Zależnie od wymienionych wyżej czynników obliczano tablicę prawdopodobieństw przejść między stanami następującej postaci:

$$1 \rightarrow 1, \quad 2 \rightarrow 2, \quad 3 \rightarrow 3,$$

$$1 \rightarrow 2, \quad 2 \rightarrow 4, \quad 3 \rightarrow 4,$$

$$1 \rightarrow 3,$$

$$1 \rightarrow 4.$$

- Dokładność określenia odległości zmieniała się na dwóch poziomach, natomiast wielkość obserwowanego celu zależała od czasu jaki upłynął od chwili, w której nastąpiła bezpośrednia widoczność celu i przyrastała skokowo przyjmując trzy różne wartości.
  - Odcinek czasu pomiędzy dwoma wystrzałami definiowano jako sumę dwóch zmiennych losowych o określonych rozkładach prawdopodobieństwa oraz składnika stałego zależnego od rodzaju broni.
- Przedstawiony model jest przykładem rozwiązywania zadań z teorii gier → formalny opis i rozwiązanie tego typu zadań na drodze analitycznej jest praktycznie nie do zrealizowania!

- Więcej konkretnych zastosowań i przykładów modelowania (symulacji) Monte Carlo (w różnych dziedzinach) omawianych jest na dalszych kursach bloku programowego „**Modelowanie komputerowe**”:
- Modelowanie zjawisk makroskopowych.
  - Komputerowe modelowanie układów złożonych.
  - Modelowanie rynków finansowych.
  - Oprogramowanie eksperymentów fizyki.
  - Zastosowanie wybranych zagadnień optymalizacyjnych w ekonomii.
